# Supplementary material for: A Multivariate Analysis-Driven Workflow to Tackle Uncertainties in Miniaturized NIR Data
Source: MDPI journal article supplement (doi:10.3390/molecules28247999), 2023-12-07
Supplement: s1 [file s1]

# A Multivariate Analysis-Driven Workflow to Tackle Uncertainties in Miniaturized NIR Data— Supplementary Materials

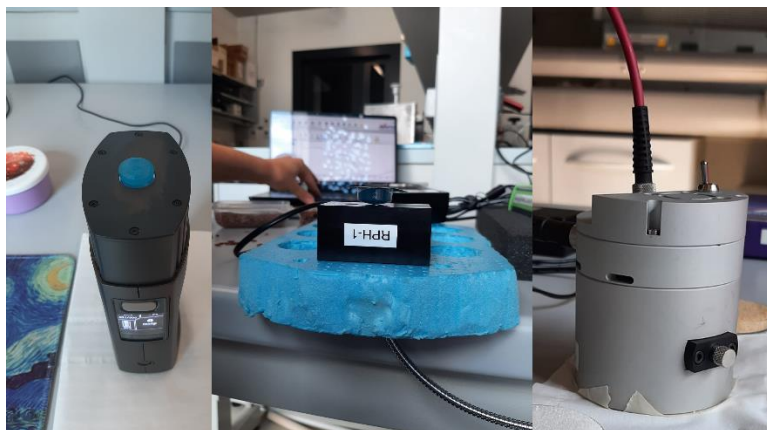

**Figure S1.** Example of configuration for spectral acquisitions.

**Table S1.** Descriptive statistics of spectra acquired with AvaSpec-Mini-NIR. Calculated on percentage reflectance data.

|                                        | Integrating sphere |          |          |          | Optical fiber |          |          |          |
|----------------------------------------|--------------------|----------|----------|----------|---------------|----------|----------|----------|
|                                        | Sample 1           | Sample 2 | Sample 3 | Sample 4 | Sample 1      | Sample 2 | Sample 3 | Sample 4 |
| Relative standard deviation (%) – mean | 6.06               | 3.96     | 2.20     | 1.57     | 126.99        | 73.39    | 9.42     | 10.05    |
| RMS – mean                             | 0.51               | 0.53     | 1.02     | 0.95     | 0.61          | 12.18    | 3.81     | 3.67     |
| RMS – standard deviation               | 0.86               | 0.28     | 0.51     | 0.34     | 0.88          | 10.28    | 2.48     | 2.57     |
| S/N mean                               | 8.74               | 25.96    | 57.49    | 92.14    | 0.98          | 1.37     | 11.18    | 10.34    |
| S/N standard deviation                 | 0.33               | 4.38     | 25.29    | 46.31    | 0.41          | 0.07     | 2.24     | 1.87     |

**Table S2.** Descriptive statistics of spectra acquired with NeoSpectra Scanner. Calculated on percentage reflectance data.

|                                        | Sample 1 | Sample 2 | Sample 3 | Sample 4 |
|----------------------------------------|----------|----------|----------|----------|
| Relative stand deviation<br>(%) – mean | 17.39    | 30.09    | 2.36     | 2.51     |
| RMS – mean                             | 0.41     | 2.36     | 0.78     | 1.26     |
| RMS – standard<br>deviation            | 0.25     | 1.29     | 0.36     | 0.37     |
| S/N mean                               | 5.98     | 3.44     | 65.05    | 47.02    |
| S/N standard deviation                 | 1.21     | 0.71     | 44.10    | 18.05    |

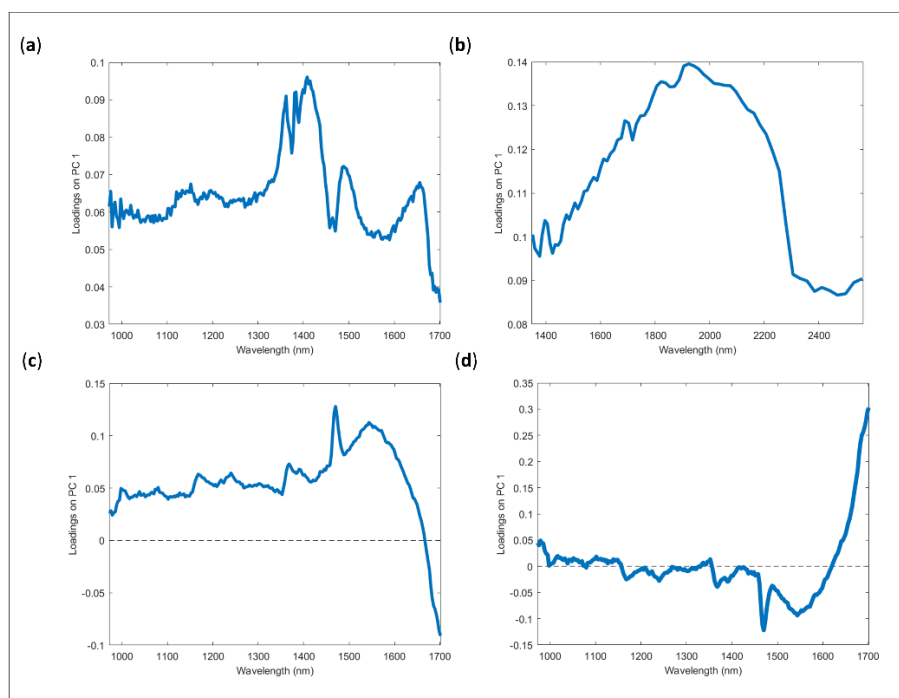

**Figure S2.** ASCA submodels examples. Loadings of the ASCA sub-model for the factor (a) session (b) replicates (c) and (d) timing of background. Instruments: (a) AvaSpec-Mini-NIR equipped with integrating sphere (b) NeoSpectra Scanner (c) and (d) AvaSpec-Mini-NIR equipped with optical fiber. Samples: (a) Sample 3 (b) Sample 2 (c) and (d) Sample 4.

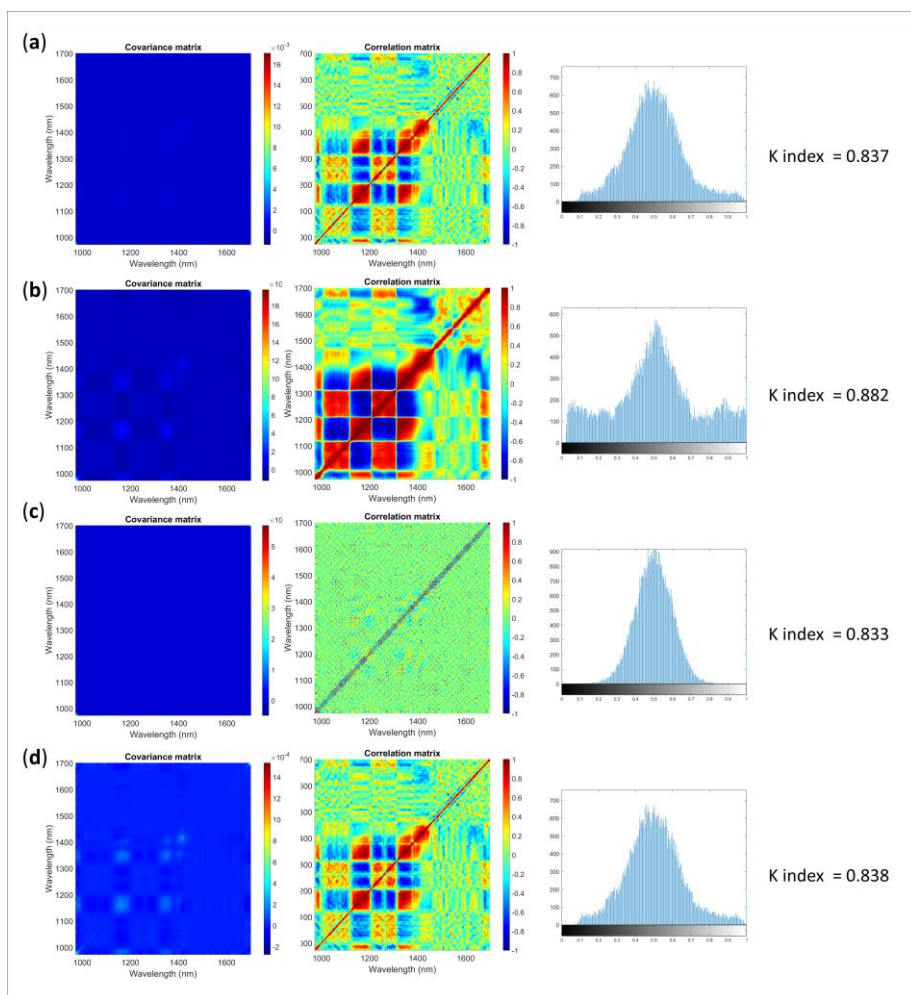

**Figure S3.** Multivariate error covariance matrix, correlation matrix, image histogram and K index for Sample 1 acquired with AvaSpec-Mini NIR with integrating sphere and preprocessed with first derivative (a)  $w = 7, d = 1, p = 2$ ; (b)  $w = 15, d = 1, p = 2$ ; (c)  $w = 7, d = 2, p = 2$ ; (d)  $w = 7, d = 1, p = 1$ .

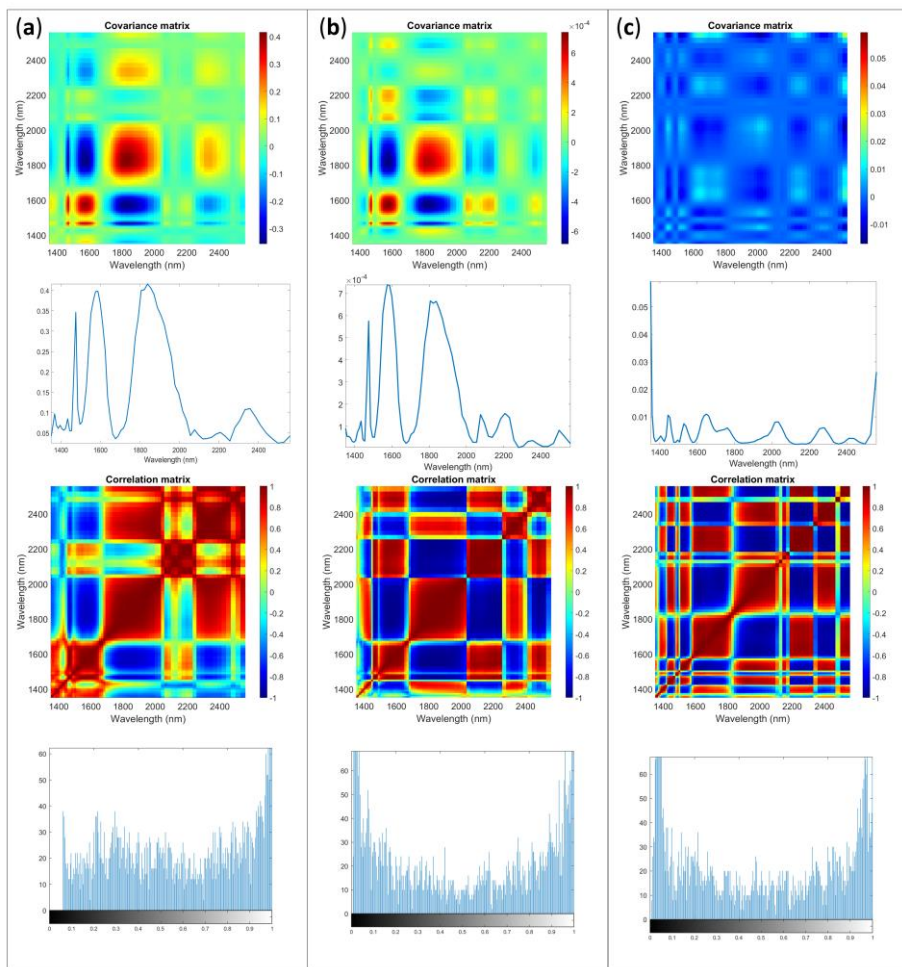

**Figure S4.** Multivariate error covariance matrix, error covariance matrix diagonal, correlation matrix and image histogram of the correlation matrix for Sample 3 acquired with NeoSpectra Scanner: (a) raw data (b) SNV (c) first derivative.

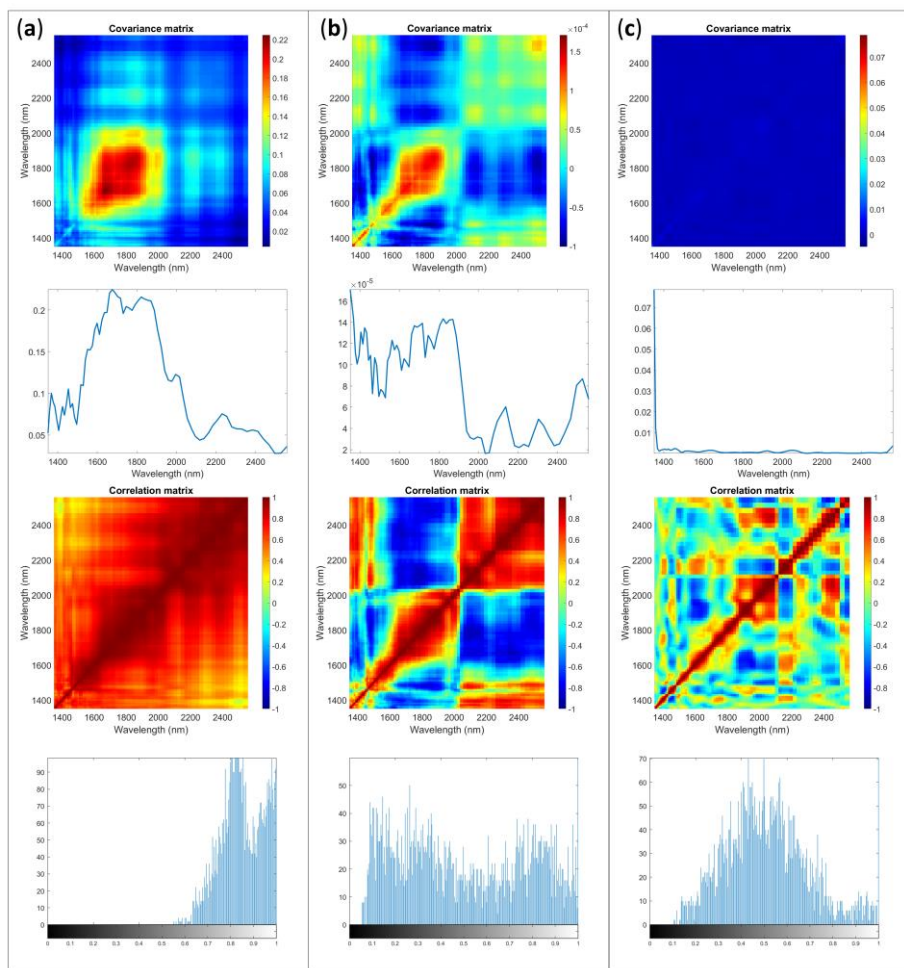

**Figure S5.** Multivariate error covariance matrix, error covariance matrix diagonal, correlation matrix and image histogram of the correlation matrix for Sample 4 acquired with NeoSpectra Scanner: (a) raw data (b) SNV (c) first derivative.
